# Supplementary material
Source: Springer Nature journal article supplement (https://www.springermedizin.de/resource/supplementary/12957_2014_1881_MOESM4_ESM.pdf/9563764)

R

L

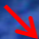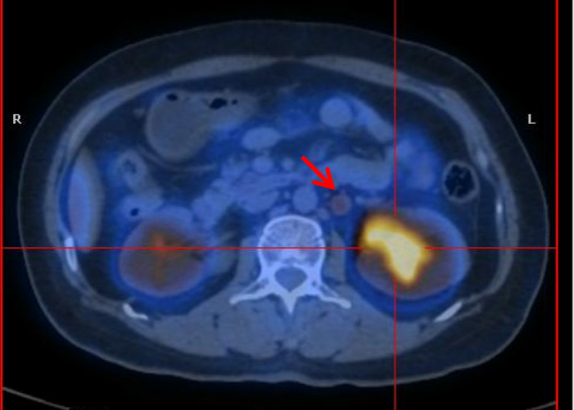

Supplement: MOESM4 [file 9563764]
